# Supplementary material
Source: publisher site journal article supplement (https://www.dovepress.com/article/612622)
Supplement: Supplementary file 1 [file 612622%20Revised%20Supplementary%20Material.docx]

*Supplemental Material*

**Table S1. UMLS Concepts for ICD-10-CM Diagnosis Codes and CPT Procedure Codes Used to Define Ruptured Aortic Disease and Aortic Repair Procedures**

| **Domain** | **UMLS Concept (Code)** | **Description** |
| --- | --- | --- |
| **Diagnosis Codes (ICD-10-CM) — Ruptured Aortic Disease** | | |
| Diagnosis | ICD10CM:I71.1 | Thoracic aortic aneurysm, ruptured |
| Diagnosis | ICD10CM:I71.3 | Abdominal aortic aneurysm, ruptured |
| Diagnosis | ICD10CM:I71.5 | Thoracoabdominal aortic aneurysm, ruptured |
| Diagnosis | ICD10CM:I71.8 | Aortic aneurysm of unspecified site, ruptured |
| Diagnosis | ICD10CM:I71.0 | Dissection of aorta |
| **Procedure Codes (CPT) — Open Aortic Repair** | | |
| Procedure | CPT:33858 | Ascending aorta graft, with cardiopulmonary bypass, includes valve suspension, when performed; for aortic dissection |
| Procedure | CPT:33859 | Ascending aorta graft, with cardiopulmonary bypass, includes valve suspension, when performed; for aortic disease other than dissection (eg, aneurysm) |
| Procedure | CPT:33866 | Aortic hemiarch graft including isolation and control of the arch vessels, beveled open distal aortic anastomosis extending under one or more of the arch vessels, and total circulatory arrest or isolated cerebral perfusion (List separately in addition to code for primary procedure) |
| Procedure | CPT:33875 | Descending thoracic aorta graft, with or without bypass |
| Procedure | CPT:33877 | Repair of thoracoabdominal aortic aneurysm with graft, with or without cardiopulmonary bypass |
| Procedure | CPT:33335 | Insertion of graft, aorta or great vessels; with cardiopulmonary bypass |
| Procedure | CPT:33390 | Valvuloplasty, aortic valve, open, with cardiopulmonary bypass; simple (ie, valvotomy, debridement, debulking, and/or simple commissural resuspension) |
| **Procedure Codes (CPT) — Endovascular Repair of Descending Thoracic Aorta** | | |
| Procedure | CPT:33880 | Endovascular repair of descending thoracic aorta (eg, aneurysm, pseudoaneurysm, dissection, penetrating ulcer, intramural hematoma, or traumatic disruption); involving coverage of left subclavian artery origin, initial endoprosthesis plus descending thoracic aortic extension(s), if required, to level of celiac artery origin |
| Procedure | CPT:33881 | Endovascular repair of descending thoracic aorta (eg, aneurysm, pseudoaneurysm, dissection, penetrating ulcer, intramural hematoma, or traumatic disruption); not involving coverage of left subclavian artery origin, initial endoprosthesis plus descending thoracic aortic extension(s), if required, to level of celiac artery origin |
| Procedure | CPT:33883 | Placement of proximal extension prosthesis for endovascular repair of descending thoracic aorta (eg, aneurysm, pseudoaneurysm, dissection, penetrating ulcer, intramural hematoma, or traumatic disruption); initial extension |
| Procedure | CPT:33884 | Placement of proximal extension prosthesis for endovascular repair of descending thoracic aorta; each additional proximal extension (List separately in addition to code for primary procedure) |
| Procedure | CPT:33886 | Placement of distal extension prosthesis(s) delayed after endovascular repair of descending thoracic aorta |
| **Procedure Codes (CPT) — Adjunct Vascular Procedures** | | |
| Procedure | CPT:33889 | Open subclavian to carotid artery transposition performed in conjunction with endovascular repair of descending thoracic aorta, by neck incision, unilateral |
| Procedure | CPT:33891 | Bypass graft, with other than vein, transcervical retropharyngeal carotid-carotid, performed in conjunction with endovascular repair of descending thoracic aorta, by neck incision |
| **Procedure Codes (CPT) — Endovascular Repair of Infrarenal Aorta (Non-rupture)** | | |
| Procedure | CPT:34701 | Endovascular repair of infrarenal aorta by deployment of an aorto-aortic tube endograft; for other than rupture (eg, for aneurysm, pseudoaneurysm, dissection, penetrating ulcer) |
| Procedure | CPT:34703 | Endovascular repair of infrarenal aorta and/or iliac artery(ies) by deployment of an aorto-uni-iliac endograft; for other than rupture (eg, for aneurysm, pseudoaneurysm, dissection, penetrating ulcer) |
| Procedure | CPT:34705 | Endovascular repair of infrarenal aorta and/or iliac artery(ies) by deployment of an aorto-bi-iliac endograft; for other than rupture (eg, for aneurysm, pseudoaneurysm, dissection, penetrating ulcer) |
| **Procedure Codes (CPT) — Endovascular Repair of Infrarenal Aorta (Rupture)** | | |
| Procedure | CPT:34702 | Endovascular repair of infrarenal aorta by deployment of an aorto-aortic tube endograft; for rupture including temporary aortic and/or iliac balloon occlusion, when performed (eg, for aneurysm, pseudoaneurysm, dissection, penetrating ulcer, traumatic disruption) |
| Procedure | CPT:34704 | Endovascular repair of infrarenal aorta and/or iliac artery(ies) by deployment of an aorto-uni-iliac endograft; for rupture including temporary aortic and/or iliac balloon occlusion, when performed |
| Procedure | CPT:34706 | Endovascular repair of infrarenal aorta and/or iliac artery(ies) by deployment of an aorto-bi-iliac endograft; for rupture including temporary aortic and/or iliac balloon occlusion, when performed |
| **Procedure Codes (CPT) — Endovascular Repair of Iliac Artery** | | |
| Procedure | CPT:34707 | Endovascular repair of iliac artery by deployment of an ilio-iliac tube endograft; for other than rupture (eg, for aneurysm, pseudoaneurysm, dissection, arteriovenous malformation), unilateral |

*Abbreviations: CPT, Current Procedural Terminology; ICD-10-CM, International Classification of Diseases, Tenth Revision, Clinical Modification; UMLS, Unified Medical Language System.*

Note: These codes were used to identify exclusion criteria (patients with prior ruptured aortic disease or aortic repair) and primary outcome events (ruptured aortic aneurysm or aortic dissection requiring surgical or endovascular repair during follow-up).

**Table S2. STROBE Statement**

**STROBE Statement — Checklist of Items for Cohort Studies**

*Supplemental Material*

**Manuscript title:** GLP-1 Receptor Agonists Reduce Aortic Dissection and Hypertensive Crisis in Diabetic Patients with Aortic Aneurysm: A Retrospective Cohort Study

**Authors:** Tsai YF, Lin HT, Liu YF, Chang R, Wu SC

**Key:** Cells highlighted in **green** indicate items updated or clarified relative to the prior version of this checklist to reflect (i) DMSO abstract format (structured with four sections: Purpose, Methods, Results, and Conclusion; ≤250 words), (ii) retention of active-comparator bias-reduction design description, and (iii) accurate characterization of sensitivity vs subgroup analyses.

| **Item No.** | **Recommendation** | **Reported on Page/Section** |
| --- | --- | --- |
| **Title and Abstract** | | |
| 1 | (a) Indicate the study's design with a commonly used term in the title or the abstract  (b) Provide in the abstract an informative and balanced summary of what was done and what was found | Title: "GLP-1 Receptor Agonists Reduce Aortic Dissection and Hypertensive Crisis in Diabetic Patients with Aortic Aneurysm: A Retrospective Cohort Study"; Abstract: restructured into four sections (Purpose, Methods, Results, Conclusion) per DMSO author guidelines; (structured format, citation-free, ≤250 words) |
| **Introduction** | | |
| 2 | Background/rationale: Explain the scientific background and rationale for the investigation being reported | Introduction, paragraphs 1–4 |
| 3 | Objectives: State specific objectives, including any prespecified hypotheses | Introduction, final paragraph: "We hypothesized that…" |
| **Methods** | | |
| 4 | Study design: Present key elements of study design early in the paper | Materials and Methods, Data Source: "retrospective, active-comparator, new-user, propensity score–matched cohort study" |
| 5 | Setting: Describe the setting, locations, and relevant dates, including periods of recruitment, exposure, follow-up, and data collection | Materials and Methods, Data Source: "TriNetX platform… 152 US healthcare organizations"; Study Population: "January 1, 2016 to December 31, 2023"; administrative censoring: August 2, 2025 |
| 6 | (a) Give the eligibility criteria, and the sources and methods of selection of participants. Describe methods of follow-up  (b) For matched studies, give matching criteria and number of exposed and unexposed | Materials and Methods, Study Population; Figure 1 (flow diagram); follow-up until outcome, death, or administrative censoring (August 2, 2025)  Materials and Methods, Propensity-Score Matching: "1:1… nearest-neighbor matching… caliper width of 0.1"; 3,857 patients per group after matching |
| 7 | Variables: Clearly define all outcomes, exposures, predictors, potential confounders, and effect modifiers. Give diagnostic criteria if applicable | Materials and Methods, Exposure Definition; Outcomes and Follow-up; Table S1 (ICD-10/CPT codes and UMLS concepts) |
| 8 | Data sources/measurement: For each variable of interest, give sources of data and details of methods of assessment | Materials and Methods, Data Source: "de-identified electronic health records"; Table S1 (UMLS concepts and code sets) |
| 9 | Bias: Describe any efforts to address potential sources of bias | Materials and Methods, Propensity-Score Matching (1:1 PSM; most covariates achieved standardized differences <0.10 after propensity-score matching, with a small number of variables showing residual imbalance); active-comparator design using DPP-4i (cardiovascular-neutral in SAVOR-TIMI 53 and EXAMINE) to isolate GLP-1RA–specific effects; Discussion, Strengths and Limitations |
| 10 | Study size: Explain how the study size was arrived at | Available data from TriNetX network used (no a priori power calculation). Results: 11,581 patients identified; 3,857 per group after PSM; Figure 1 |
| 11 | Quantitative variables: Explain how quantitative variables were handled in the analyses | Materials and Methods, Statistical Analysis: age and continuous variables treated as continuous in PS model; Table 1 (mean ± SD for continuous variables); subgroup analyses categorized age, BMI, and HbA1c using prespecified thresholds |
| 12 | (a) Describe all statistical methods, including those used to control for confounding  (b) Describe any methods used to examine subgroups and interactions  (c) Explain how missing data were addressed  (d) If applicable, describe analytical methods taking account of sampling strategy  (e) Describe any sensitivity analyses | (a) Materials and Methods, Statistical Analysis: Cox proportional hazards models stratified by matched pairs; Kaplan–Meier survival analysis; log-rank tests; NNT derived from absolute risk reduction  (b) Results: Pre-specified subgroup analyses by age (<65 vs ≥65), sex, race, BMI, HbA1c (<9% vs ≥9%), and major comorbidities (Figures 3, 5, 7); univariable Cox models per subgroup  (c) Methods: TriNetX PSM incorporated "availability of key laboratory values" as a covariate to account for differential measurement; aggregate EHR data preclude individual-level missingness quantification  (d) N/A (not applicable — TriNetX provides patient-level rather than survey-weighted data)  (e) No formal pre-specified sensitivity analyses (e.g., alternative PS caliper, E-value) were conducted; subgroup analyses serve as exploratory consistency checks. This is acknowledged as a study limitation. |
| **Results** | | |
| 13 | (a) Report numbers of individuals at each stage of study  (b) Give reasons for non-participation at each stage  (c) Consider use of a flow diagram | (a) Figure 1; Results, Study Population: 11,581 identified (GLP-1RA n=5,676; DPP-4i n=5,905) → 7,714 matched (3,857 per group)  (b) Figure 1: exclusion criteria listed (age <18, ruptured aneurysm history, prior aortic repair)  (c) Figure 1 (CONSORT-style flow diagram) |
| 14 | (a) Give characteristics of study participants and information on exposures and potential confounders  (b) Indicate number of participants with missing data for each variable of interest  (c) Summarise follow-up time | (a) Table 1 (Baseline Characteristics); most covariates achieved standardized differences <0.10 after propensity-score matching, with a small number of variables showing residual imbalance  (b) Individual-level missing data counts are unavailable from TriNetX aggregate platform; missingness addressed by including laboratory availability as a propensity-score covariate (Materials and Methods, PSM section)  (c) Results: median follow-up 31.1 months (IQR 17.8–44.4) in GLP-1RA cohort; 44.0 months (IQR 18.6–69.4) in DPP-4i cohort |
| 15 | Outcome data: Report numbers of outcome events or summary measures over time | Results: Primary outcome — 169 vs 234 aortic events; Secondary outcomes — 192 vs 239 hypertensive crises; 748 vs 1,026 deaths; cumulative incidence at 1,800 days reported for each outcome |
| 16 | (a) Give unadjusted estimates and, if applicable, confounder-adjusted estimates and their precision  (b) Report category boundaries when continuous variables were categorized  (c) If relevant, consider translating estimates of relative risk into absolute risk for a meaningful time period | (a) Results: univariable Cox HRs with 95% CI for all outcomes following PSM (propensity-matched analysis provides confounder adjustment); most covariates achieved standardized differences <0.10 after propensity-score matching, with a small number of variables showing residual imbalance  (b) Results/Figures 3, 5, 7: Age (<65 vs ≥65 years); BMI (<25, 25–30, ≥30 kg/m²); HbA1c (<9% vs ≥9%)  (c) Results: NNT derived from absolute risk reduction over 5 years — NNT=60 (aortic events), NNT=81 (hypertensive crisis), NNT=14 (mortality) |
| 17 | Other analyses: Report other analyses done — e.g., analyses of subgroups and interactions, and sensitivity analyses | Figures 3, 5, 7: pre-specified subgroup analyses by demographics (age, sex, race), metabolic parameters (BMI, HbA1c), and major comorbidities (COPD, ESRD, malignancy, organ transplantation) |
| **Discussion** | | |
| 18 | Key results: Summarise key results with reference to study objectives | Discussion, paragraph 1: HR 0.75 (aortic events), HR 0.77 (hypertensive crisis), HR 0.64 (mortality) reported with NNTs; linked to prespecified hypotheses |
| 19 | Limitations: Discuss limitations of the study, taking into account sources of potential bias or imprecision. Discuss both direction and magnitude of any potential bias | Discussion, Strengths and Limitations: residual confounding, EHR misclassification, medication adherence unverifiable, absent aneurysm imaging data, US-based generalizability, multiple comparisons without formal adjustment, competing risks not modelled |
| 20 | Interpretation: Give a cautious overall interpretation of results considering objectives, limitations, multiplicity of analyses, results from similar studies, and other relevant evidence | Discussion: contextualized against LEADER, SUSTAIN-6, REWIND CVOTs; mechanistic support from Sardu et al. (2025) and Zhang et al. (2024); NNT comparison with established cardiovascular interventions; cautious language throughout |
| 21 | Generalisability: Discuss the generalisability (external validity) of the study results | Discussion, Strengths and Limitations: "generalizability may be limited by predominantly US-based study population" |
| **Other Information** | | |
| 22 | Funding: Give the source of funding and the role of the funders for the present study and, if applicable, for the original study on which the present article is based | Funding section: "This research received no external funding" |

***Note:***

*This checklist is based on the STROBE Statement (www.strobe-statement.org). An Explanation and Elaboration article discusses each checklist item and gives methodological background and published examples of transparent reporting.*

**Reference:** von Elm E, Altman DG, Egger M, Pocock SJ, Gøtzsche PC, Vandenbroucke JP; STROBE Initiative. The Strengthening the Reporting of Observational Studies in Epidemiology (STROBE) statement: guidelines for reporting observational studies. Lancet. 2007;370:1453–1457.
